# Supplementary material for: A 2D carbon nitride-based electrochemical aptasensor with reverse amplification for highly sensitive detection of okadaic acid in shellfish
Source: Royal Society of Chemistry journal article supplement (doi:10.1039/d3ay02002a), 2024-01-01
Supplement: d3ay02002a1.pdf [file d3ay02002a1.pdf]

## Supporting Information

### **2D Carbon Nitride-based Electrochemical Aptasensor with Reverse Amplification for Highly-Sensitive Detection of Okadaic Acid in Shellfish**

Yating Chen<sup>a,#</sup>, Yiwei Liu<sup>a,#</sup>, Ping Zhu<sup>a</sup>, Shuge Liu<sup>a</sup>, Miaomiao Wang<sup>a</sup>, Yage Liu<sup>a</sup>, Zhiyao Wang<sup>a</sup>, Wei Chen<sup>a</sup>, Zhan Qu<sup>\*a</sup>, Liping Du<sup>\*a</sup>, and Chunsheng Wu<sup>\*a</sup>

<sup>a</sup> Institute of Medical Engineering, Department of Biophysics, School of Basic Medical Sciences, Health Science Center, Xi'an Jiaotong University, Xi'an 710061, China

\* Correspondence author: Z. Qu (zhan.qu@xjtu.edu.cn), L. Du (e-mail: duliping@xjtu.edu.cn) and C. Wu (e-mail: wuchunsheng@xjtu.edu.cn).

# These authors contributed equally.

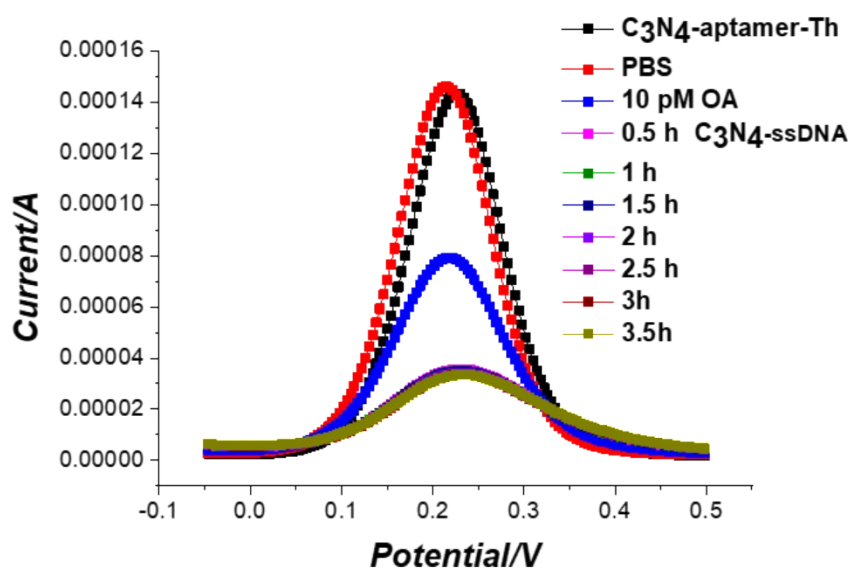

Fig S1. After responding to 10 pM OA, the DPV measurement of C<sub>3</sub>N<sub>4</sub>-aptamer-Th modified electrode on different incubation times with C<sub>3</sub>N<sub>4</sub>-ssDNA.
